# Supplementary material
Source: publisher figshare collection journal article supplement (https://acs.figshare.com/ndownloader/files/11452163)
Supplement: Supplementary file 1 [file 11452163]

## Supporting Information

# Enhancement of adsorption performance for organic molecules by combined effect of intermolecular interaction and morphology in porous rGO-incorporated hydrogels

*Seungmin Lee<sup>†,‡,1</sup>, Byung Joon Moon<sup>†,1</sup>, Hyun Jung Lee<sup>§</sup>, Sukang Bae<sup>†</sup>, Tae-Wook Kim<sup>†</sup>,  
Yong Chae Jung<sup>†</sup>, Jong Hyeok Park<sup>‡</sup>, and Sang Hyun Lee<sup>\*,†</sup>*

<sup>†</sup>Institute of Advanced Composite Materials, Korea Institute of Science and Technology, Chudong-ro 92, Bongdong-eup, Wanju-gun, Jeonbuk 55324, Republic of Korea.

<sup>‡</sup>Department of Chemical and Biomolecular Engineering, Yonsei University, 50 Yonsei-ro, Seodaemun-gu, Seoul 03722, Republic of Korea

<sup>§</sup>BioNano Health Guard Research Center, 125 Gwahak-ro, Yuseong-gu, Daejeon 34141, Republic of Korea

**Corresponding Author (Dr. Lee)**

**E-mail address: sanghyun.lee@kist.re.kr**

## Table of Contents

1. Theoretical equations for adsorption
2. Visual dispersibility test for rGO sheets (**Figure S1**)
3. Photograph images of Ar-rGO composite aerogels (**Figures S2~S3**)
4. Cross-sectional SEM images of agarose and Ar-rGO<sub>30</sub> (**Figure S4**)
5. Composition ratios of Ar-rGO<sub>x</sub> (**Table S1**)
6. Characterization of porous structure of the adsorbent (**Figures S5~S6 & Tables S2~S3**)
7. Static water contact angle analysis of Ar-rGO<sub>x</sub> composites (**Figure S7**)
8. XPS analysis of agarose and rGO matrix (**Figures S8~S9**)
9. FT-IR, XPS and UV-vis absorption spectra of Ar and Ar-rGO<sub>30</sub> before/after adsorption of RhB (**Figures S10~S11**)
10. Kinetic study of RhB adsorption over agarose-based adsorbents (**Figures S12~S14 & Tables S4~S5**)
11. Adsorption isotherm study of the removal of RhB molecules (**Figure S15 & Tables S6~S7**)
12. Kinetic study of RhB desorption over Ar-rGO<sub>30</sub> (**Figures S16~S17**)
13. Effect of additives on the adsorption properties of adsorbents (**Figure S18**)
14. XPS and Raman analysis of rGO and GO (**Figure S19**)
15. Reusability and recyclability test of Ar-rGO<sub>30</sub> (**Figures S20~S22**)
16. pH-Stability test of Ar-rGOs at various pH values (**Figures S23~S24**)
17. Batch adsorption experiment for the removal of various organic pollutants (**Figure S25**)

## 1. Theoretical equations for adsorption

### 1.1 Adsorption kinetics.

#### (1) Pseudo-first-order kinetic model:

$$\ln(q_{e,cal} - q_t) = \ln q_{e,cal} - k_1 t \quad (1)$$

#### (2) Pseudo-second-order kinetic model:

$$\frac{t}{q_t} = \frac{1}{k_2 q_{e,cal}^2} + \frac{1}{q_e} t \quad (2)$$

where  $q_{e,cal}$  is the calculated dye adsorption capacity (g/mg) at equilibrium. Also,  $k_1$  (1/min) and  $k_2$  (g/mg min) is the pseudo-first order rate constant of adsorption and the pseudo-second order rate constant of adsorption process, respectively.<sup>1</sup> Based on the slope and intercept of pseudo-first-order and pseudo-second-order model (Fig. 4c, d), the values of  $k_1$ ,  $k_2$  and  $q_{e,cal}$  were obtained as presented in Table S3. In addition, the validity of the kinetic models was evaluated in terms of regression coefficient ( $R^2$ ).

#### (3) Intra-particle diffusion kinetic model:

$$q_t = k_{nd} t + C_n \quad (3)$$

where  $k_{nd}$  is the intra-particle diffusion constant (mg/g min<sup>1/2</sup>) and  $C_n$  is the intercept at specific steps (n).<sup>2</sup>

### 1.2 Adsorption isotherms.

#### (1) Langmuir isotherm:

$$\frac{C_e}{q_e} = \frac{1}{q_m b} + \frac{C_e}{q_m} \quad (4)$$

where  $q_m$  is the maximum adsorption capacity (mg/g) of the adsorbent and  $b$  is the

Langmuir constant related to the energy of adsorption. Also,  $C_e$  is the concentration of adsorbate under equilibrium condition. The applicability of Langmuir equation depends upon the dimensionless factor  $R_L$ , which is calculated using the following equation:

$$R_L = \frac{1}{1 + bC_0} \quad (5)$$

where  $C_0$  is the initial dye concentration (mg/L). The value of  $R_L$  between 0 and 1 supports favorable adsorption.

**(2) Freundlich isotherm:**

$$\log q_e = \log K_f + \frac{1}{n} \log C_e \quad (6)$$

where  $K_f$  and  $1/n$  is the Freundlich constants related to adsorption capacity (L/g) and adsorption intensity.

**(3) Dubinin-Kaganer-Radushkevich (DKR) isotherm:**

$$\ln q_e = \ln q_D - \beta \varepsilon^2 \quad (7)$$

where  $q_D$  is the DKR isotherm constant related to degree of adsorption (mg/g),  $\beta$  is the activity coefficient and  $\varepsilon$  is the Polanyi potential, which is calculated using the following equation:

$$\varepsilon = RT \ln\left(1 + \frac{1}{C_e}\right) \quad (8)$$

Also, the apparent energy of adsorption ( $E$ ) is calculated from the following equation:

$$E = \frac{1}{(2\beta)^{1/2}} \quad (9)$$

**1.3 Thermodynamic parameters.**

$$\Delta G^0 = -RT \ln K_L \quad (10)$$

$$\ln K_L = \frac{-\Delta H^0}{RT} + \frac{\Delta S^0}{R} \quad (11)$$

where  $R$  is the gas constant ( $8.314 \text{ J mol}^{-1} \text{ K}^{-1}$ ),  $T$  is the absolute temperature in  $K$ ,  $K_L$  is the distribution coefficient,  $\Delta G^0$  is the change in free energy,  $\Delta S^0$  is the change in entropy,  $\Delta H^0$  is the change in enthalpy.

## 2. Visual dispersibility test for rGO sheets

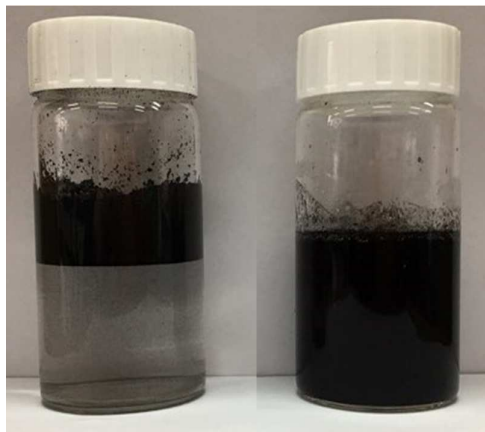

**Figure S1.** Visual dispersibility test for rGO (**Left:** only DI-water, **Right:** DI-water + agarose 2 wt%) at room temperature.

### 3. Photograph images of Ar-rGO composite aerogels

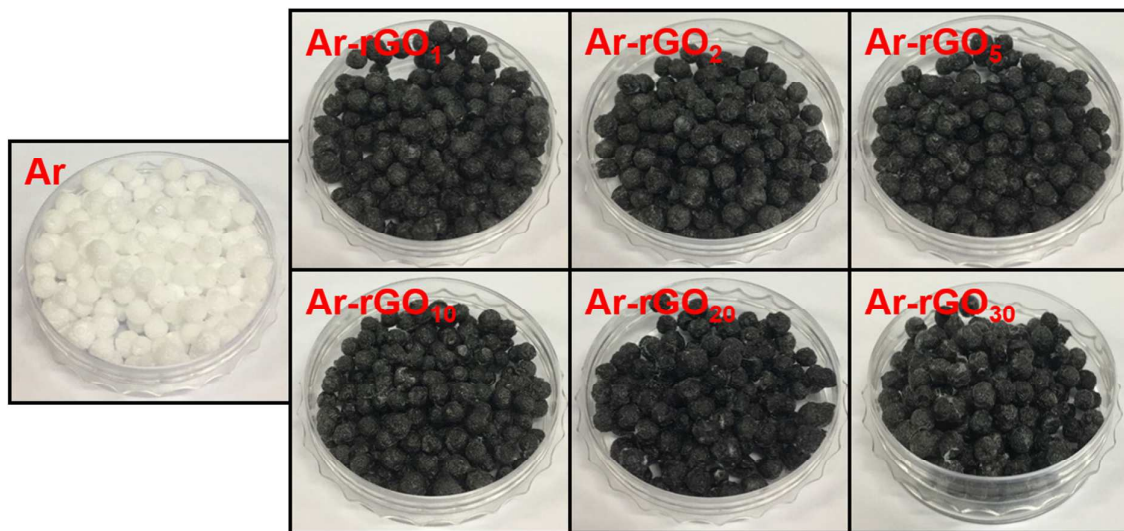

**Figure S2.** Optical photographs of Ar-rGO composites with different content of rGO.

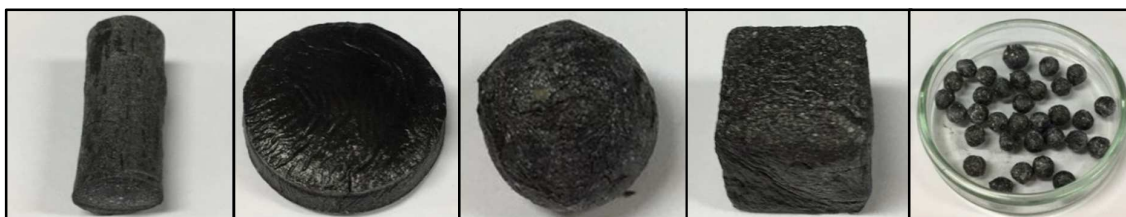

**Figure S3.** Optical photographs of Ar-rGO composites in various forms. (cylinder, sphere, rectangle, and beads)

#### 4. Cross-sectional SEM images of agarose and Ar-rGO<sub>30</sub>

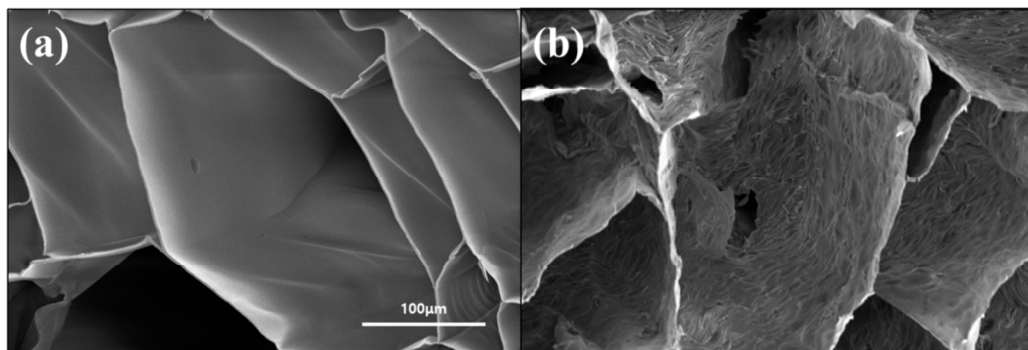

**Figure S4.** Cross-sectional FE-SEM images of (a) agarose and (b) Ar-rGO<sub>30</sub>.



## 5. Composition ratios of Ar-rGO<sub>x</sub>

**Table S1.** Composition ratios of Ar-rGO<sub>x</sub>.

| <b>Sample</b>              | <b>Agarose:rGO<br/>(weight ratio)</b> | <b>Agarose<br/>(weight, unit: g)</b> | <b>rGO<br/>(weight, unit: g)</b> |
|----------------------------|---------------------------------------|--------------------------------------|----------------------------------|
| <b>Ar-rGO<sub>2</sub></b>  | 98.0:2.0                              | 0.2                                  | 0.004                            |
| <b>Ar-rGO<sub>5</sub></b>  | 95.2:4.8                              | 0.2                                  | 0.01                             |
| <b>Ar-rGO<sub>10</sub></b> | 90.9:9.1                              | 0.2                                  | 0.02                             |
| <b>Ar-rGO<sub>20</sub></b> | 83.3:16.7                             | 0.2                                  | 0.04                             |
| <b>Ar-rGO<sub>30</sub></b> | 76.9:23.1                             | 0.2                                  | 0.06                             |

## 6. Specific surface area, total pore area and average pore size of Ar-GO<sub>x</sub>

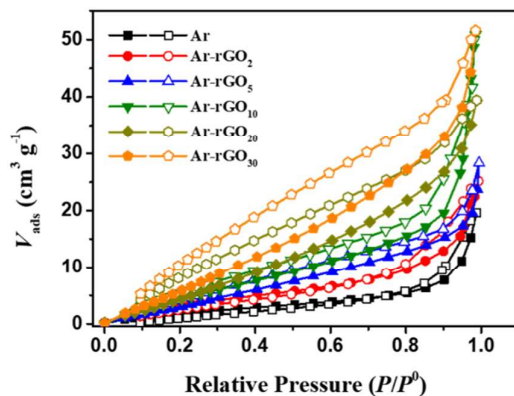

**Figure S5.** N<sub>2</sub> adsorption/desorption isotherms at 77 K of the adsorbents.

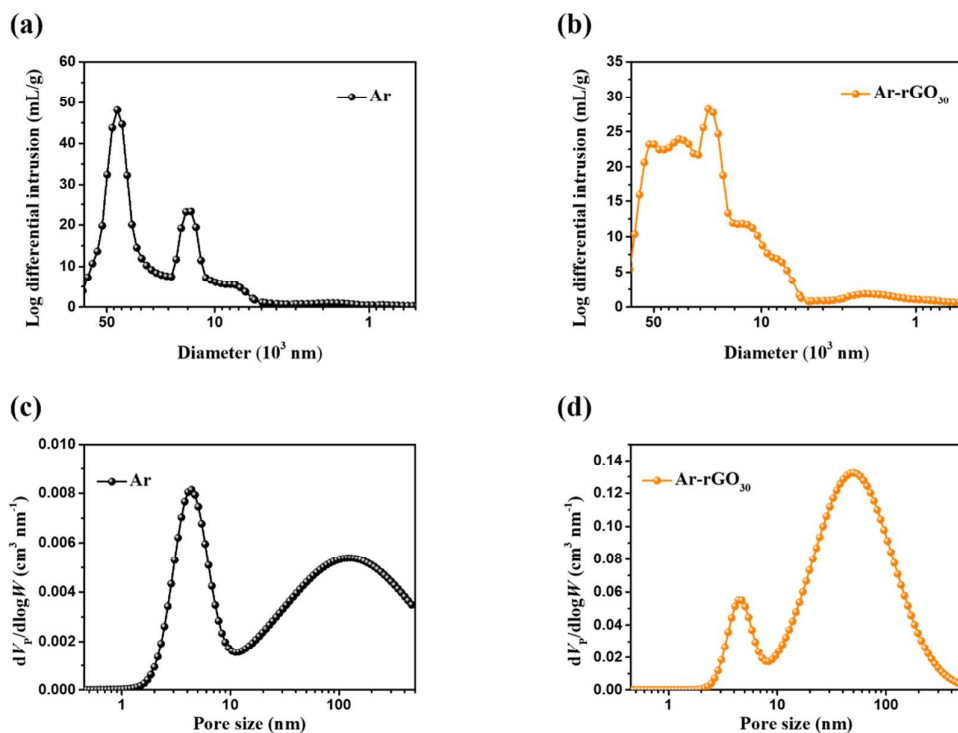

**Figure S6.** Macro-pore size distribution of the samples (Ar and Ar-rGO<sub>30</sub>) obtained by mercury porosimetry (a, b). Micro- and mesopore volume distribution of the samples, analyzed by the NLDFT method (c, d).

**Table S2.** Specific surface area (SSA) of Ar and Ar-rGO<sub>x</sub>.

| Sample                                | Ar    | Ar-rGO <sub>2</sub> | Ar-rGO <sub>5</sub> | Ar-rGO <sub>10</sub> | Ar-rGO <sub>20</sub> | Ar-rGO <sub>30</sub> |
|---------------------------------------|-------|---------------------|---------------------|----------------------|----------------------|----------------------|
| <b>BET SSA</b><br>(m <sup>2</sup> /g) | 8.296 | 13.950              | 17.789              | 23.457               | 28.976               | 35.629               |

**Table S3.** Pore volume and size of the adsorbents.

|                            | BET SSA*<br>(m <sup>2</sup> /g) | Total pore<br>volume*<br>(cm <sup>3</sup> /g) | Mean pore<br>Diameter*<br>(nm) | Pore<br>volume**<br>(cm <sup>3</sup> /g) | Total pore<br>area***<br>(m <sup>2</sup> /g) | Average pore<br>Diameter***<br>(μm) |
|----------------------------|---------------------------------|-----------------------------------------------|--------------------------------|------------------------------------------|----------------------------------------------|-------------------------------------|
| <b>Ar</b>                  | 8.296                           | 0.0304                                        | 14.634                         | 0.0395                                   | 33.765                                       | 2.185                               |
| <b>Ar-rGO<sub>30</sub></b> | 35.629                          | 0.0798                                        | 8.954                          | 0.1345                                   | 60.402                                       | 1.431                               |

\* These values were calculated from BET method.

\*\* These values were calculated from NLDFT method.

\*\*\* These parameters were examined by using mercury porosimetry.

## 7. Static water contact angle analysis of Ar-rGO<sub>x</sub> composites

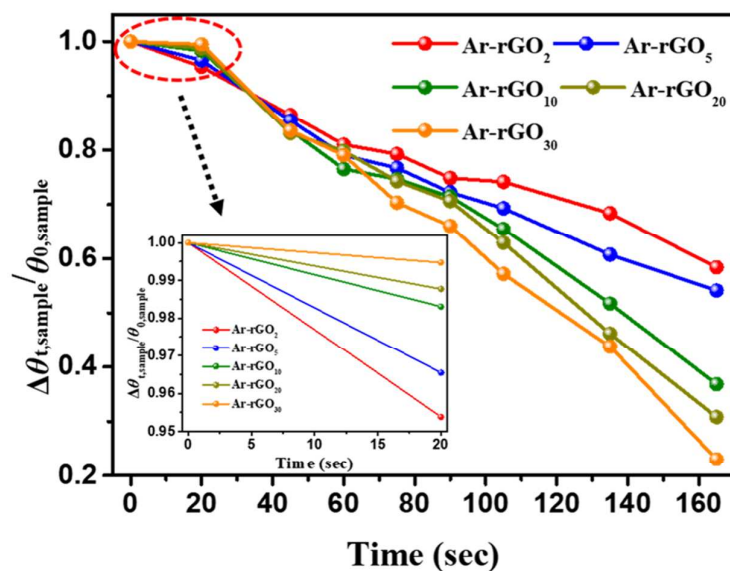

**Figure S7.** Relative contact angle variation of Ar-rGO<sub>x</sub> composites, which can be triggered by water sorption into the samples, as function of retention time (Initial contact angle of water droplet: 75.17° (Ar-rGO<sub>2</sub>), 79.38° (Ar-rGO<sub>5</sub>), 82.16° (Ar-rGO<sub>10</sub>), 84.06° (Ar-rGO<sub>20</sub>) and 87.53° (Ar-rGO<sub>30</sub>)).

## 8. XPS analysis of agarose and rGO matrixs

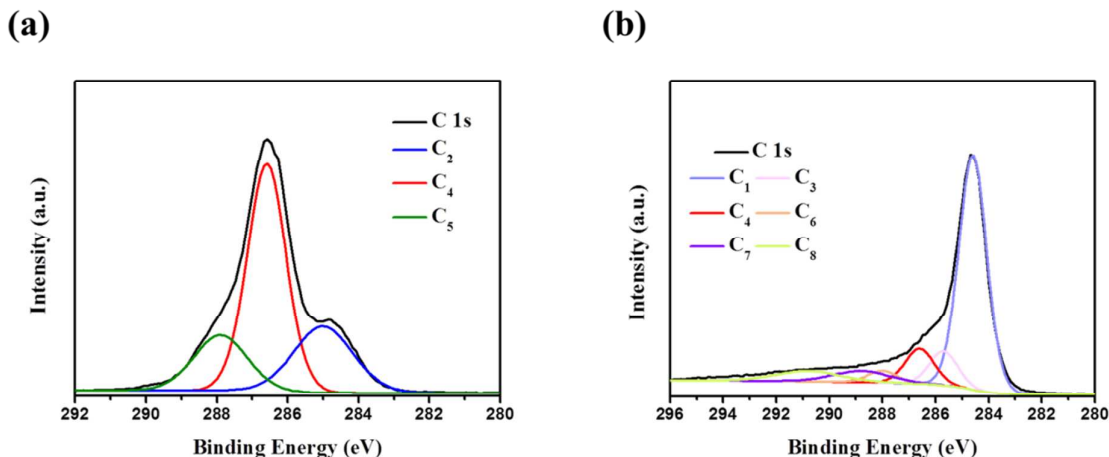

**Figure S8.** C 1s XPS spectra for (a) agarose and (b) rGO composites: The high-resolution C 1s spectrum of agarose can be deconvoluted into three signals for the  $C_xH_y$  structure (linear and saturated hydrocarbon,  $C_2$ ), C-O bond (alkoxy group,  $C_4$ ) and C-O-C bond ( $C_5$ ) at 285.0, 286.6 and 287.9 eV, respectively, whereas that of rGO can be fitted to six components, including  $sp^2$  C-C bond ( $C_1$ , 284.6 eV),  $sp^3$  C-C bond ( $C_3$ , 285.7 eV),  $C_4$ , C=O bond (carbonyl group,  $C_6$ , 288.0 eV), O=C-O bond (carboxylic group,  $C_7$ , 288.8 eV) and  $\pi$ - $\pi^*$  satellite peak ( $C_8$ , 290.8 eV).

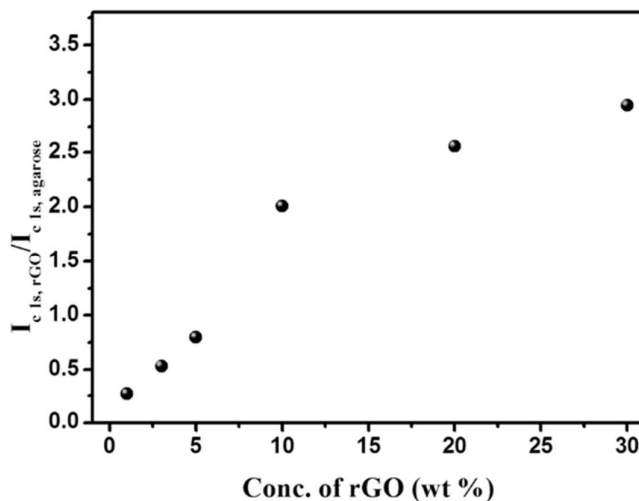

**Figure S9.** Relative peak-intensity ratio in C 1s spectra ( $I_{C\ 1s,\ 284.6\ eV} / I_{C\ 1s,\ 286.6\ eV}$ ) as a function of rGO concentration in Ar-rGO<sub>x</sub>.

## 9. FT-IR, XPS and UV-vis absorption spectra of Ar and Ar-rGO<sub>30</sub> before/after adsorption of RhB

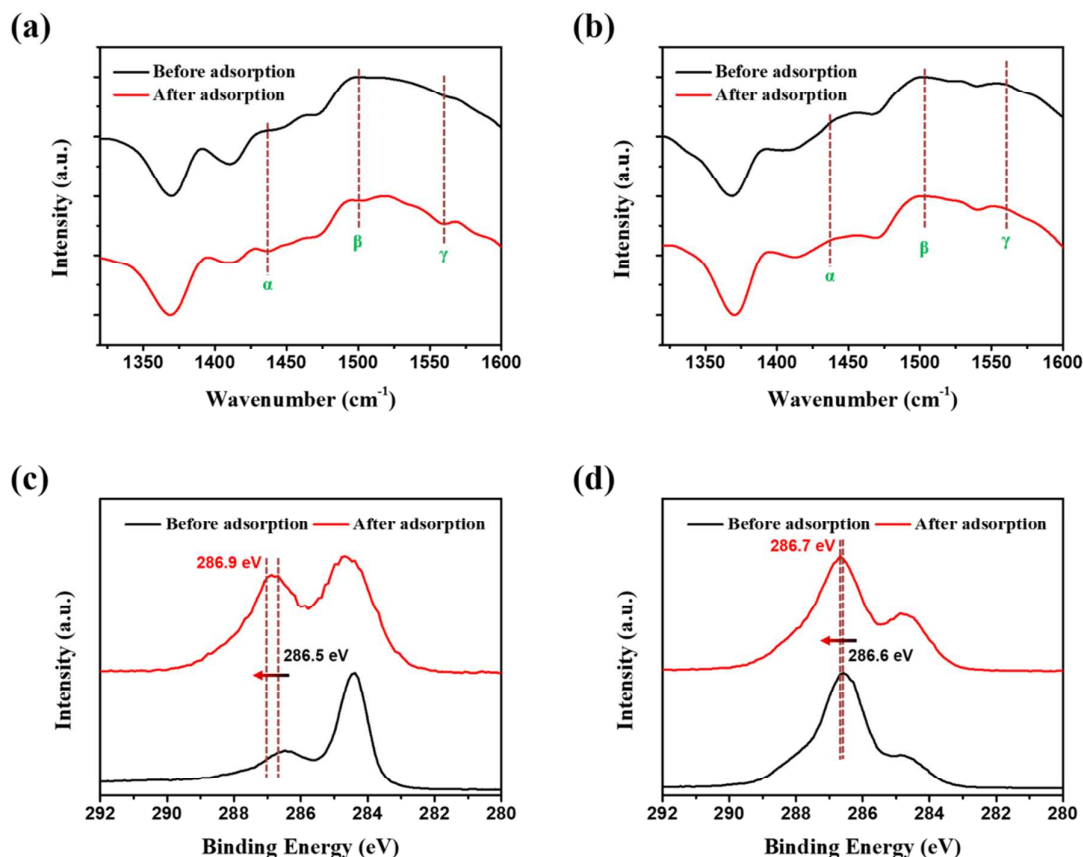

**Figure S10.** FT-IR spectra of (a) Ar-rGO<sub>30</sub> and (b) Ar (Peak assignments: approximately 1437 (symmetric stretching of non-hydrogen bonded C=O, denoted as  $\alpha$ ), 1503 (N–H stretching vibration, denoted as  $\beta$ ) and 1575 (C=N, denoted as  $\gamma$ ) cm<sup>-1</sup>. The spectra were displayed within the wavelength of 1325~1600 cm<sup>-1</sup>. C 1s spectra of (c) Ar-rGO<sub>30</sub> and (d) Ar (Peak assignments: C–O (approximately 286.5 eV) and C=O (approximately 287.0 eV). These adsorption experiments were performed under the following conditions: 500 mg/L (Initial Conc.); 1 mg/mL (adsorbent dose); 25 °C (temperature).

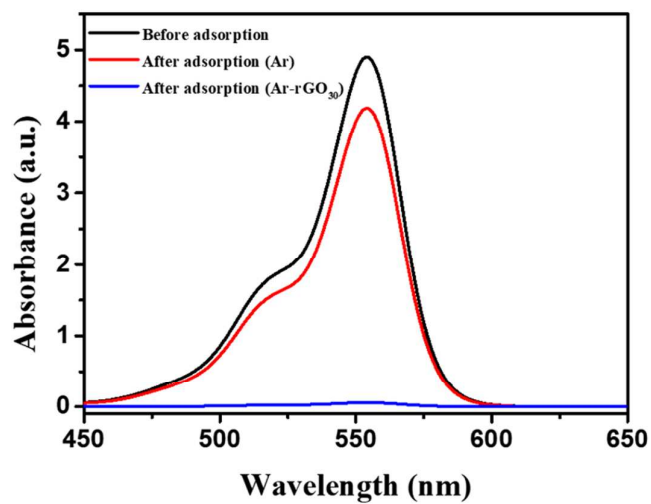

**Figure S11.** Representative UV-vis absorption spectra of RhB solution before and after the adsorption process (approximately 36 hr). These adsorption experiments were performed under the following conditions: 500 mg/L (Initial Conc.); 1 mg/mL (adsorbent dose); 25 °C (temperature); pH 7.0.

## 10. Kinetic study of RhB adsorption over agarose-based adsorbents

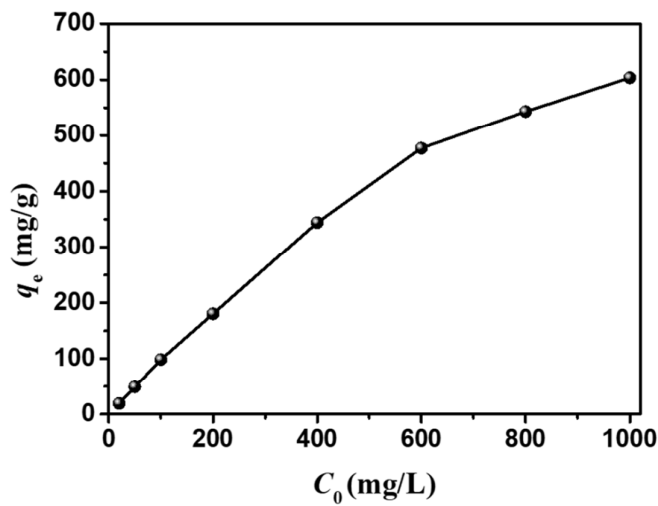

**Figure S12.** Effect of initial solution concentration (solvent: DI-water) on the adsorption capacity of RhB onto Ar-rGO<sub>30</sub>. (adsorbent dose: 1 mg/mL and temperature: 25 °C)

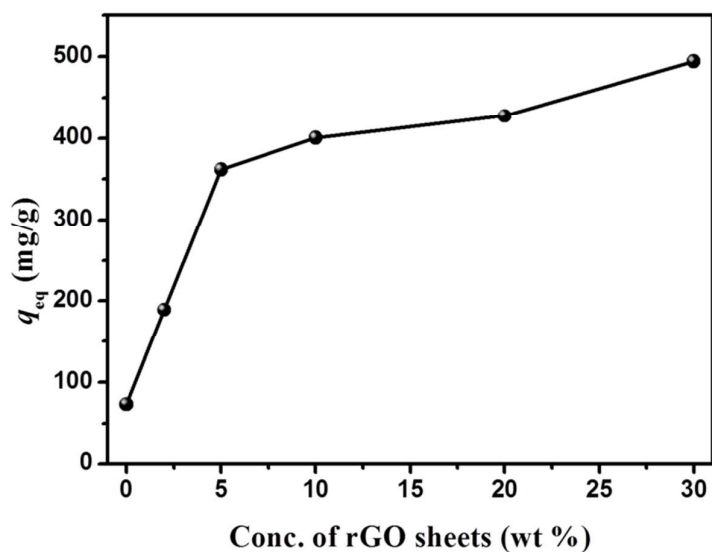

**Figure S13.**  $q_{eq}$  values of Ar-rGO<sub>x</sub> as a function of rGO concentration. The absorbance of RhB at approximately 530 nm ( $\lambda_{max}$ ) was used to determine the concentration of residual dye molecules for samples.



**Table S4.** Parameters of pseudo-first-order and pseudo-second-order kinetic models for the adsorption of RhB onto agarose and Ar-rGO<sub>x</sub>.

|                            | $q_{e,exp}$<br>(mg/g) | Pseudo-first-order model         |                       |         | Pseudo-second-order model            |             |         |
|----------------------------|-----------------------|----------------------------------|-----------------------|---------|--------------------------------------|-------------|---------|
|                            |                       | $k_1$<br>(10 <sup>-3</sup> /min) | $q_{e,cal}$<br>(mg/g) | $R^2$   | $k_2$<br>(10 <sup>-3</sup> g/mg/min) | $q_{e,cal}$ | $R^2$   |
| <b>Agarose</b>             | 73.07                 | 3.81                             | 99.04                 | 0.95874 | 8.78                                 | 113.90      | 0.77684 |
| <b>Ar-rGO<sub>2</sub></b>  | 188.93                | 1.81                             | 168.11                | 0.85958 | 4.81                                 | 207.90      | 0.97659 |
| <b>Ar-rGO<sub>5</sub></b>  | 361.75                | 2.31                             | 373.03                | 0.90299 | 2.42                                 | 413.22      | 0.98928 |
| <b>Ar-rGO<sub>10</sub></b> | 400.12                | 2.75                             | 378.90                | 0.84081 | 2.32                                 | 431.04      | 0.99533 |
| <b>Ar-rGO<sub>20</sub></b> | 427.36                | 2.18                             | 263.08                | 0.89288 | 2.22                                 | 450.45      | 0.99901 |
| <b>Ar-rGO<sub>30</sub></b> | 494.23                | 2.68                             | 232.82                | 0.92930 | 1.95                                 | 512.82      | 0.99985 |

**Table S5.** Parameters of Intra-particle diffusion models for the adsorption of RhB onto agarose and Ar-rGO<sub>x</sub>.

|                                                 | Inter-particle Diffusion               |         |                                        |         |
|-------------------------------------------------|----------------------------------------|---------|----------------------------------------|---------|
|                                                 | $k_{1d}$<br>(mg/g/min <sup>1/2</sup> ) | $R^2$   | $k_{2d}$<br>(mg/g/min <sup>1/2</sup> ) | $R^2$   |
| <b>Ar</b>                                       | 0.71                                   | 0.94385 | 3.43                                   | 0.97709 |
| <b>Ar-rGO<sub>30</sub></b>                      | 24.80                                  | 0.98323 | 2.69                                   | 0.92327 |
| <b>Ar-rGO<sub>30</sub><br/>(with agitation)</b> | 78.28                                  | 0.98403 | 10.72                                  | 0.93984 |

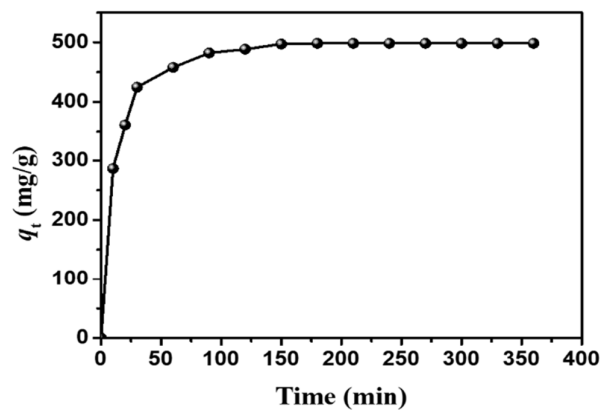

**Figure S14.** Effect of the agitation process on adsorption capacity of Ar-rGO<sub>30</sub> for RhB as function of adsorption time at room temperature. (Initial Conc.: 500 mg/L, adsorbent dose: 1 mg/mL, pH: 7.0 and temperature: 25 °C)

## 11. Adsorption isotherm study of the removal of RhB molecules

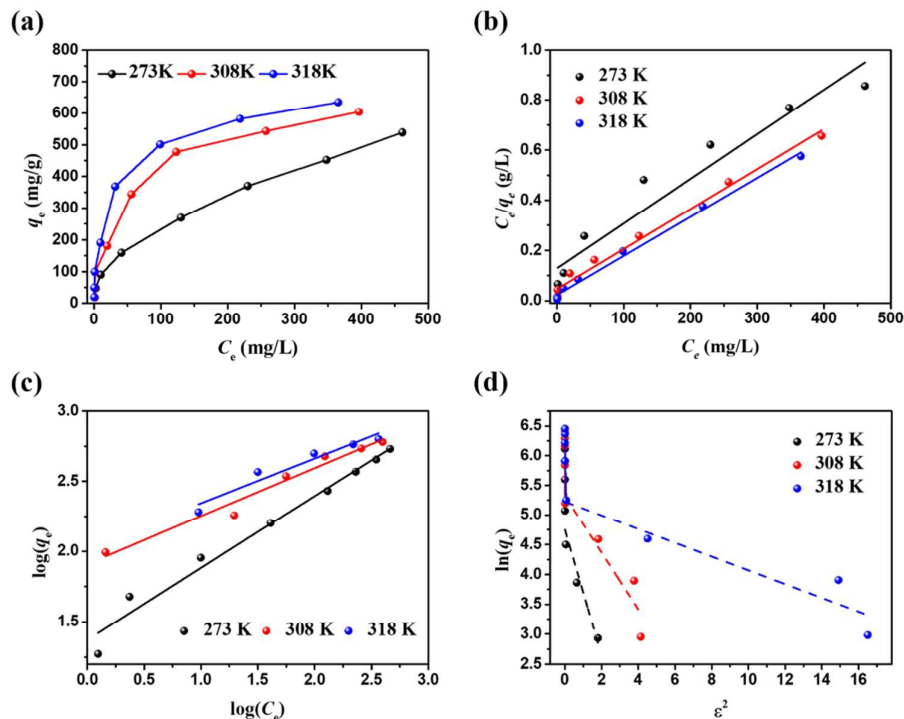

**Figure S15.** (a) Adsorption isotherms of RhB by the Ar-rGO<sub>30</sub> composite at different temperature. (b) Langmuir isotherms, (c) Freundlich isotherms and (d) DKR isotherms for the adsorption of RhB by the Ar-rGO<sub>30</sub> composite at different temperature. (Adsorbent dose: 1 mg/mL and pH: 7.0)

**Table S6.** Isotherm parameters for RhB adsorption onto Ar-rGO<sub>30</sub> composite.

| Isotherms                          | Isotherm constants | Temperature (K)       |                 |                 |
|------------------------------------|--------------------|-----------------------|-----------------|-----------------|
|                                    |                    | 273                   | 308             | 318             |
| Langmuir                           | $q_m$ (mg/g)       | 561.80                | 628.93          | 645.16          |
|                                    | $b$ (L/mg)         | 0.01379               | 0.03412         | 0.06641         |
|                                    | $R^2$              | 0.927                 | 0.986           | 0.993           |
|                                    | $R_L$              | 0.0677 ~ 0.7838       | 0.0285 ~ 0.5944 | 0.0148 ~ 0.4295 |
| Freundlich                         | $1/n$              | 2.2024                | 2.9222          | 3.1255          |
|                                    | $K_F$              | 31.3210               | 81.1947         | 105.3934        |
|                                    | $R^2$              | 0.997                 | 0.964           | 0.923           |
| Dubinin-Kaganer-Radushkevich (DKR) |                    | Relatively low $C_0$  |                 |                 |
|                                    | $q_D$ (mg/g)       | 115.41                | 203.24          | 244.28          |
|                                    | $E$ (KJ/mol)       | 0.6890                | 1.0261          | 2.0823          |
|                                    | $R^2$              | 0.886                 | 0.825           | 0.847           |
|                                    |                    | Relatively high $C_0$ |                 |                 |
|                                    | $q_D$ (mg/g)       | 413.81                | 506.79          | 529.22          |
|                                    | $E$ (KJ/mol)       | 0.0389                | 0.0874          | 0.1828          |
|                                    | $R^2$              | 0.714                 | 0.855           | 0.841           |

**Table S7.** Thermodynamic parameters for the adsorption of RhB onto Ar and Ar-rGO<sub>30</sub>.

| Sample               | Temperature<br>(°C) | Thermodynamic parameters     |                              |                               |
|----------------------|---------------------|------------------------------|------------------------------|-------------------------------|
|                      |                     | $\Delta G^\circ$<br>(kJ/mol) | $\Delta H^\circ$<br>(kJ/mol) | $\Delta S^\circ$<br>(J/mol K) |
| Ar                   | 273                 | 5.88                         | 6.43                         | 2.03                          |
|                      | 308                 |                              |                              |                               |
|                      | 318                 |                              |                              |                               |
| Ar-rGO <sub>30</sub> | 273                 | -6.41                        | 6.07                         | 45.71                         |
|                      | 308                 | -7.23                        |                              |                               |
|                      | 318                 | -7.46                        |                              |                               |

## 12. Kinetic study of RhB desorption over Ar-rGO<sub>30</sub>

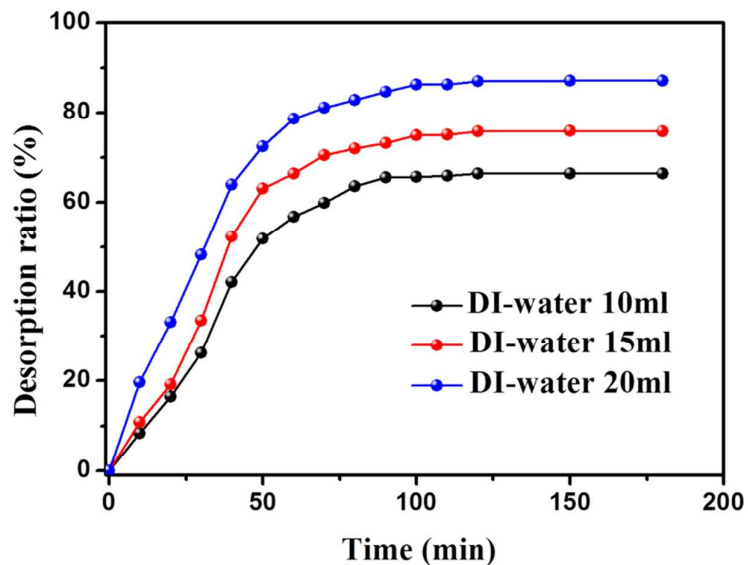

**Figure S16.** Desorption ratio of RhB molecules from Ar-rGO<sub>30</sub> beads over time. For this study, the adsorption experiment was performed under the following conditions: Initial Conc.: 500 mg/L, adsorbent dose: 1 mg/mL, pH: 7.0 and temperature: 25 °C.

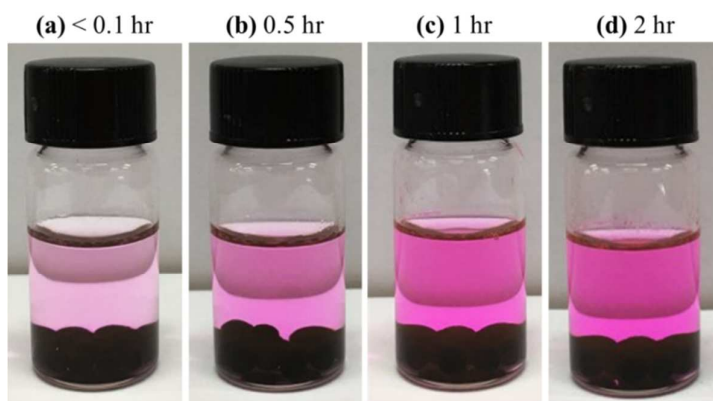

**Figure S17.** Optical photographs of Ar-rGO<sub>30</sub>, which is adsorbed with RhB molecules, in DI-water for (a) less than 0.1 hr, (b) 0.5 hr, (c) 1 hr and (d) 2 hr.

### 13. Effect of additives on the adsorption properties of adsorbents

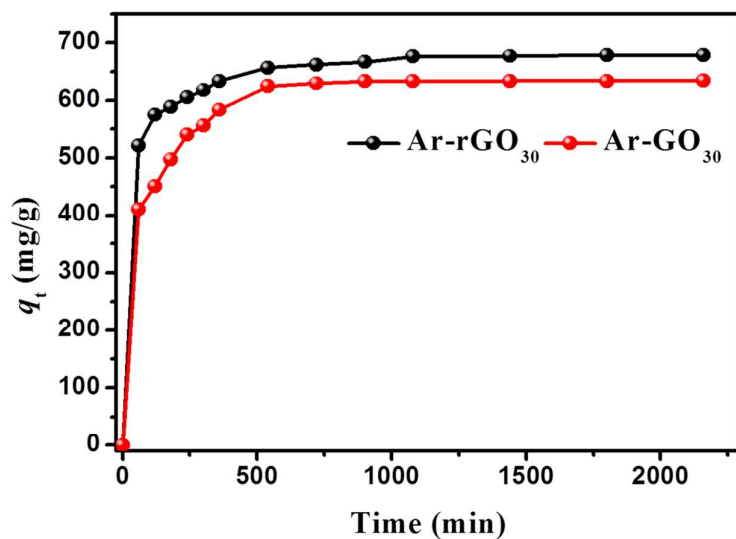

**Figure S18.** Effect of filler materials (GO and rGO) on adsorption capacity for RhB as function of adsorption time. (Initial Conc.: 750 mg/L, adsorbent dose: 1 mg/mL, pH: 7.0 and temperature: 25 °C)

## 14. XPS and Raman analysis of rGO and GO

(a)

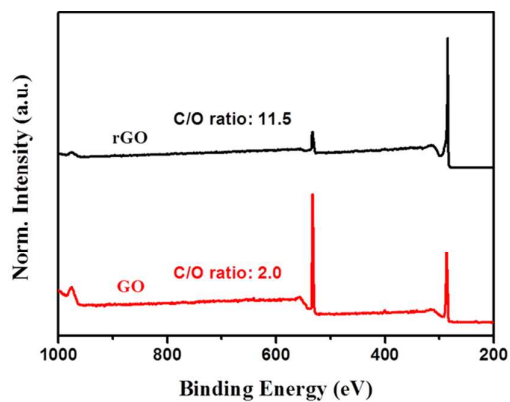

(b)

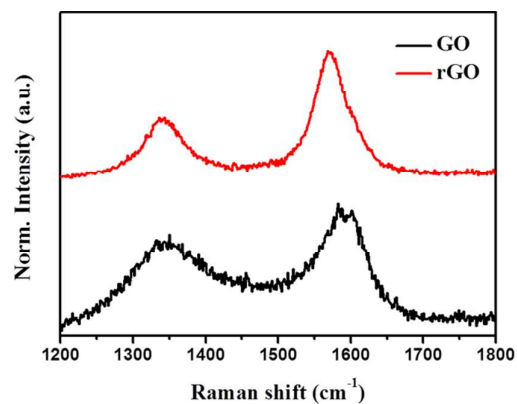

**Figure S19.** (a) Typical XPS survey spectra of rGO and GO. The focal X-ray beam size is approximately 200  $\mu\text{m}$ . (b) Raman spectra of rGO and GO with green (514 nm) laser radiations.

### 15. Reusability and recyclability test of Ar-rGO<sub>30</sub>

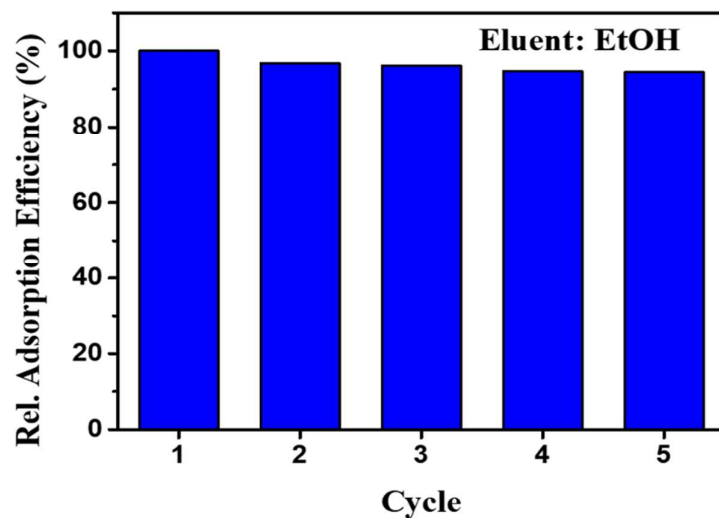

**Figure S20.** Recycling of Ar-rGO<sub>30</sub> composites for the capture of RhB molecules (Initial Conc.: 500 mg/L, Adsorbent dose: 1 mg/mL, Eluent Vol.: 10 mL and Temp.: 25 °C).

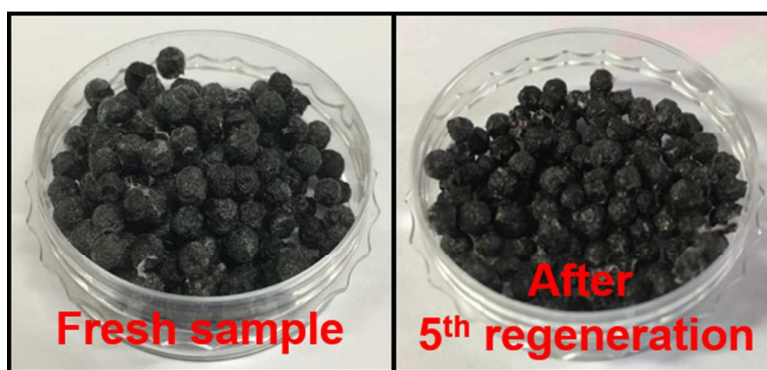

**Figure S21.** Optical photographs of Ar-rGO<sub>30</sub> beads (left: fresh sample & right: after 5<sup>th</sup> regeneration)



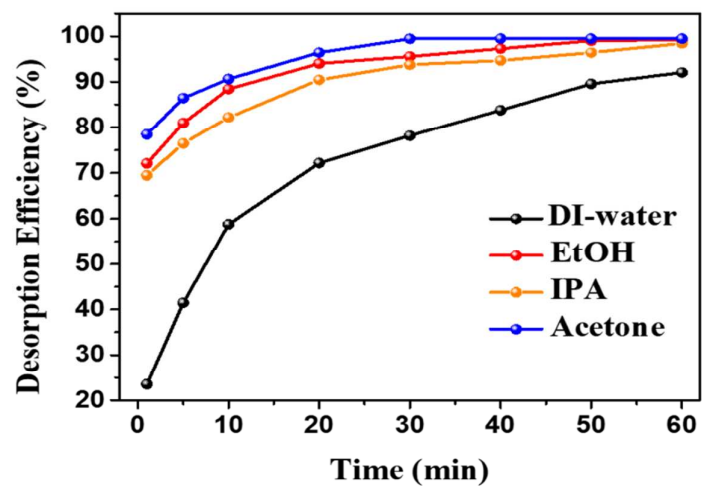

**Figure S22.** Desorption plots of RhB molecules by Ar-rGO<sub>30</sub>. (Eluent Vol.: 30 mL, Temp.: 25 °C).

## 16. pH-Stability test of Ar-rGOs at various pH values

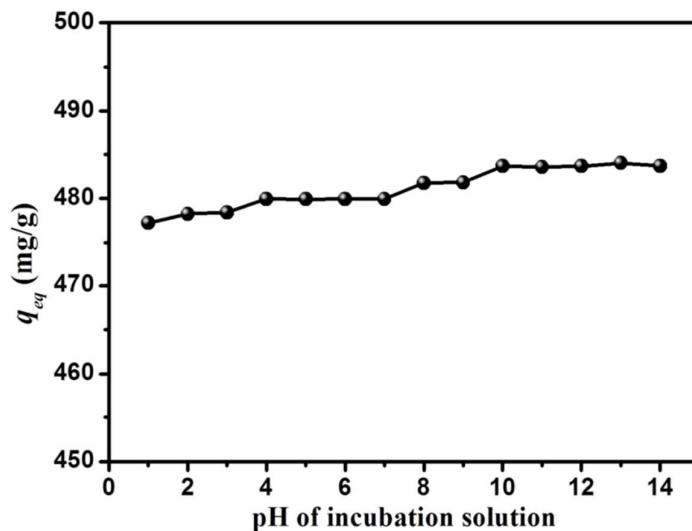

**Figure S23.** Effect of pH on stability of Ar-rGO<sub>30</sub>. Ar-rGO<sub>30</sub> was incubated for 36 hr at room temperature (pH range: 1 ~ 14), thereafter it was washed with DI-water several times to get rid of the residual HCl or NaOH solution.

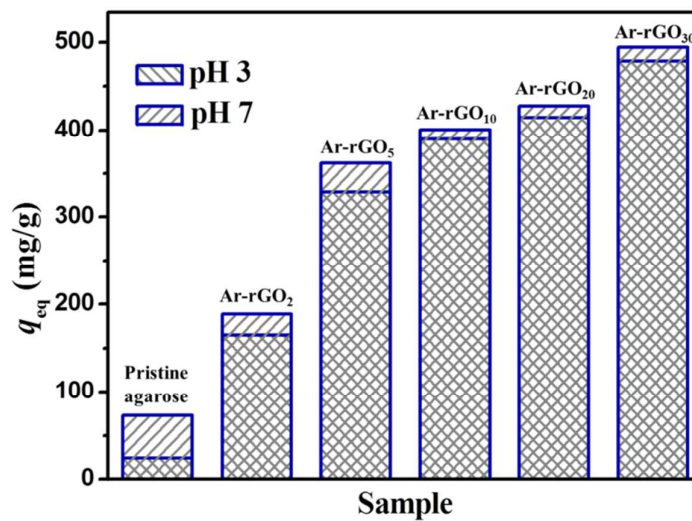

**Figure S24.** Effect of H<sup>+</sup> ions on the adsorption performance of each adsorbent. (Initial Conc.: 500 mg/L, adsorbent dose: 1 mg/mL and temperature: 25 °C)

## 17. Batch adsorption experiment for the removal of various organic pollutants

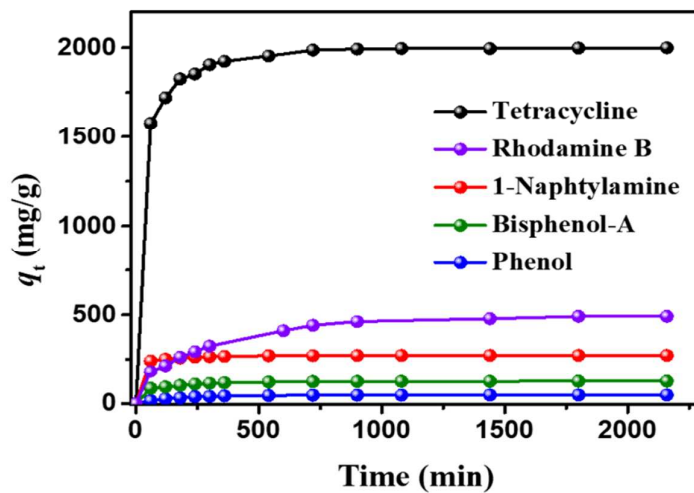

**Figure S25.** Kinetic data for the adsorption of various organic pollutants (Phenol, 1-Naphthylamine, Bisphenol-A, Rhodamine B and Tetracycline) by Ar-rGO<sub>30</sub>. The initial concentration of solutions is 0.0005 mol/L.

## REFERENCES

- (1) Azizian, S. Kinetic Models of Sorption: A Theoretical Analysis. *J. Colloid Interface Sci.* **2004**, 276, 47-52.
- (2) Furusawa, T.; Smith, J. M. Intraparticle Mass Transport in Slurries by Dynamic Adsorption Studies. *AIChE J.* **1974**, 20, 88-93.
